# Supplementary material for: Genetic Editing of HBV DNA by Monodomain Human APOBEC3 Cytidine Deaminases and the Recombinant Nature of APOBEC3G
Source: PLOS journal article supplement (doi:10.1371/journal.pone.0004277), 2009-01-23
Supplement: S1 (10.1371/journal.pone.0004277.s001) [file journal.pone.0004277.s001]

**Supporting Information Figure 1. Complete collections of A3 edited HBV sequences derived from the supernatants of QT6 transfected cells**

**QT6/HBV+3A@88.4°C**

CCAACTGGATCCTGCGCGGGACGTCCTTTGTTTACGTCCCGTCGGCGCTGAATCCTGCGGACGACCCTTCTCGGGGTCGCTTGGGACTCTCTCGTCCCCTTCTCC-GTCTGCCGTTCCGACCGACCACGGGGCGCACCTCTCTTTACGCGGACTCCCCGTCTGTGCCTTCTC

.......................................................................T.................................-.......A....A...A.................................................

................................C.....................................................................................A...A.....AAAA.A......................................

.................................................A.......................................................-......................AA.................A.AA.....................

.................................................A............A..........................................-............A...A.................................................

.......A.........A...............................A......A.........................AAA....................-............A...A.......................................A.........

......................A......A.....A....A..AA.A..A......A.AA..A...................AAA........A...........-A...A..A....A...A.....AAAA.A.............A.AA.......A...A.A.......

......................A............A....A..AA.A..A......A.AA..A.........A.....A...A......................-A...A..A....A...A.....AAAA.A.............A.AA.......A...A.........

......AA.....A.A.............A.............AA.A..A......A.AA..A.........A................................-A........................................A.AA...........A.A.......

.............A.A.A....A..........................A............A...................AAA....................-............A...A.....A..................A........................

.............................A...................A............A..........................................-............A.........A....................................T......

.............................A..............A.A..A......A.A...A.........A.........A..........A...........-A...A..A....A...A.......................................A.A.......

........................................A..A..A..A........AA.............................................-A...A..A....A...A........................A.AA.......A...A.A.......

......AA.....A.A.AAA..A......A.....A..........................A..........................................-.......A....A..............................A......................

......AA.....A.A.AAA..A......A.....A....A..AA.A..A................................AAA........A...........-A...A..A....A...A........................A.AA.....................

.................AAA..A......A.............................A..A........T.................................-A...A..A..........................................................

.......A.........AAA.........A..........A..A.....A........AA..A.........AAA...A...AAA....................-....A..A....A...A.....AAA..A.............A.AA...........A.........

.................AAA.............................A........AA..A..........................................-............A...A.....A...........................................

......AA.........AAA.........A...................A......A.AA..A.....................A....................-............A...A.................................................

......AA.........AAA.........A...................A................................AAA....................-..................................................................

......AA.........AAA.........A..........A..A.....A........AA..A.........AAA...A...AAA....................-....A..A....A...A.....AAA..A.............A.AA...........A.........

......AA.........AAA.........A..........A..A.....A........AA..A.........AAA...A...AAA....................-A...A..A....A...A........................A.AA.......A...A.A.......

......AA.........AA..........A.............AA....A............A...................AAA....................-............A...A.....A.....................A.....................

......AA............A........A...................A........AA..A.........A................................-A........................................A.AA...........A.A.......

......AA.......A.............A...................A........AA............A.........AAA........A...........-A...A..A....A...A.....AAAA.A.......T.....A.AA.....................

......AA.....................A...................A......A.AA..A...........................--.A...........-A......A....A...A........................A.AA.......A...A.A.......

......AA.....................A...................A............A.........A................................-.......A....A.....................................................

......AA.....................A...................A............A.........AA...............................-..........................................................A.......

......AA.....................A.....A....A..AA.A..A......A.AA..A.........A.....A...AAA........A...........-.........................................A.AA.......A...A.A.......

......AA...........................A....A..AA.A..A......A...............AAA...A...AAA....................-..................................................................

......AA.........................................A................................AAA........A...........-.......A....A...A.....A....................AA.............A.......

.................A.A.............................A......A.....A.........AA........A......................-....A.............................................................

......AA.....A.A.............A..........................................AAAA......AAA....................-A...A..A....A...A........................A.AA.......A...A.A.......

......AA.....A.A.AAA..A......A.....A....A..AA.A..A......A.AA..A.........AAAA..A...AAA........A...........-.......A....A...A.....AAAA.A.............A.AA.....................

......AA.....A.A.AAA..A......A.....A....A..AA.A..A......A.AA..A.........AAAA..A...AAA........A...........-.........................................A.AA.......A...A.A.......

........................................A.................AA..A.........AAAA..A...AAA.....T..A...........-............A...A.....AAA..A.............A.AA.......A...A.A.......

.............A.A.AAA..A......A.....A....A..AA.A..A......A.AA..A.........AAAA..A...AAA........C...........-.......A....A...A.....AAAA.A.............A.AA.....................

.............A.A.AAA..A......A.....A....A..AA.A..A........AA..A.........AAAA..A...AAA........A...........-.......A....A...A.....AAAA.A.............A.AA..C..............C...

......................A......A.....A....A..A..A...............A.........AAAA..A...A......................-A...A..A....A...A.....AAAA.A.............A.AA.......A.....A.......

.............A...AAA..A.......................................A.........AAAA..A...AAA........A...........-A...A..A....A...A.....AAAA.A.............A.AA.......A...A.A.......

.............A...AAA..A.......................................A.........AAAA..A...AAA........A...........-A...A..A....A...A.....AAAA.A.............A.AA.......A.............

T.G...................A......A.....A....A..AA.A..A......A.AA..A...................AAAX.......A...........-A...A..A....A...A.....AAAA.A.............A.AA.......A...A.A.......

.................AAA.........AC.........A..A.....A........AA..A.........AAA...A...AAA....................-....A..A....A...A.....AAA..A.............A.AA...........A.........

......................A......A.....A....A..AA.A..A..C...................AAAA..A...AAA........A...........-A...A..A....A...A.....AAAA.A......................................

..........................................T..........T...............T.T..................T.T........T.TT-..T.......TT.....................T.T............TTTT...........T.T

........................TT................................................................T.T........T.TT-..T...T..........................T.T............TTTT.............T

.............................................T.......TT..T...T...TT..T.T.....T.T........T.T.T..TTTT..T.T--..T..TT...TT..TT..TT.T....T.T.TT.T.T....T.T...T.TTTT..T....TT..T.T

........................TT........T..TTT..T....T.....TTT.T...T..TTT..T.T.....T........T.T.T.T..TTTT..T.T--..T..TT...TT..TT..TT.T....T.T.TT.T.T..........T.TTTT..T....TT..TTT

........................TT........T..TTT..T....T.....TT..T...T..TTT..T.T.....T.T......T.T.T.T...TTT..T.TT-..T..TT...TT...T..TT.T......T.TT.T.T....T.T...T.TTTT..T....TT..T.T

........................TT........T..TTT..T....T.....TT..T...T..TTT..T.T.....T.T......T.T.T.T..TTTT..T.TT-..T..TT...TT...T..TT.T......T.TT.T.T..-.T.T...T.TTTT..T....TT..T.T

TT..T.....TT..T.........TT........T..TTT..T....T.....TT..T...T..TTT..T.T.....T.T......T.T.T.T..TTTT..T.TT-..T..TT...TT...T..TT.T......T.TT.T.T....T.T...T.TTTT..T....TT..T.T

TT..T.....TT..T...........................T..........TT..T...T..TTT..T.T.....T........T.T.T.T..TTTT..T.TTT..T..TT...TT..TT..TT.T....T.T.TT.T.T..........T.TTTT..T....TT..T.T

TT..T.....TT..T...........................T..........TT..T...T..TTT..T.T.....T........T.T.T.T..TTTT..T.TT-..T..TT...TT..TT..TT.T....T.T.TT.T.T..........T.TTTT..T....TT..T.T

TT..T.....TT..T...........................T..........TT..T...T..TTT..T.T.....T..C.....T.T.T.T..TTTT..T.T--..T..TT...TT..TT..TT.T....T.T.TT.T.T....T.....T.TTTT..T....TT..T.T

TT..T.....TT..T...........................T..........TT..T...T..TTT..T.T.....T........T.T.T.T..TTTT..T.T--..T..TT...TT..TT..TT.T....T.T.TT.T.T..........T.TTTT..T....TT....T

TT..T.....TT..T...........................T..........TT..T...T..TTT..T.T.....T........T.T.T.T..TTTT..T.---..T..TT...TT..TT..TT.T....T.T.TT.T.T..........T.TTTT..T....TT..T.T

..........TT....T.......TT................T..........TT..T...........T.T................T.T.T........T.TT-..T.......TT................T....T.T....T.......TTTT..T.....T..T.T

..........................C...............................................................T.T........T.TT-..T...T...TT...T...T.T........TT.T.T....T.......TTTT..T.....T..T.T

..........TT..................C...........T..........T...............T.T..................T.T........T.TT-..T...T...TT.........T.........T.T.T...T........TTTT...........T.T

..........TT....T.......TT................T..........TT..T...........T.T................T.T.T........T.TT-..T.......TT.....................T.T....T.......TTTT..T.....T..T.T

........................TT................T..........TT..T...........T.T................T.T.T........T.TT-..T.......TT.....................T.T....T.......TTTT..T.....T..T.T

..........................................................................................T.T........T.TT-......T...TT...T...T.T........TT.T.T....T.......TTTT..T.....T..T.T

........................T............................TT..............T.T................T.T.T........T.TT-..T.........................T....T.T............TTTT.............T

**QT6/HBV+3H@88.4°C**

CCAACTGGATCCTGCGCGGGACGTCCTTTGTTTACGTCCCGTCGGCGCTGAATCCTGCGGACGACCCTTCTCGGGGTCGCTTGGGACTCTCTCGTCCCCTTCTCCGTCTGCCGTTCCGACCGACCACGGGGCGCACCTCTCTTTACGCGGACTCCCCGTCTGTGCCTTCTC

.................................................A...................................................................A...A.................................................

.................................................A.........A........................A.............................A..A...A...........................A.....................

...........................................................A.........................................................A...A.........................................A.......

.......................................T.........A.........A.........................................................A...A.................................................

.................................................A.........A........................A................................A...A...........................A.....................

.................................................A.........A.AA.................C....................................A...A.....C...........................................

...........................................................A.................................................A.......A...A.................................................

...........................................................A........................A................................A...A.................................................

...........................................................A........................A................................A...........................................A.........

...........................................................A........................A................................A...........................................A.........

.................................................A.........................A........A....................................A.................................................

...........................................................................A........A....................................A.................................................

.................................................A............................A..........................A......A..........................................................

.........................................................................A...............................A...........A...............................A.....................

.......................................................................T.A...............................A...........A...............................A.....................

.................................................A............A...A.................A....................A...........A...A.................................................

.................................................A............................A..........................A......A...............A...................A......................

...........................................................A..A...................AA.........................A.......A.....................................................

.........................................................................A...............................A...........A...............................A...........A.........

.................................................A.........A...................T.....................................................................A...........A.A.......

.................................................A............A.....................A................................A............................A.AA.....................

.................................................A......A..A..A.....................A........................A...........A.......................................A.A.......

...........................................................A.........................................................A...A..........................AA.....................

.................................................A............A.....................A................................A..T...........................AA.....................

.................................................A............A.....................A................................A..............................AA.....................

.................A.........................A...............A.............................................................A.................................................

.................................................A.........A.................................A.......................A...A.................................................

.................................................A........AA........................A........................A...........A.......................................A.A.......

.......A...................................A.....A.........A..A..................................................................................................A.........

.......A.........................................A......A....................................................A...........A.......................................A.A.......

.......A...................................A.....A.........A..A............................................................................................................

.......A...................................A.....A.........A..A..................................................................................................A........T

.......A.........................................A...................................................................A...........................................A.........

.......A.........................................A............A......................................................A...A.................................................

.......A.........................................A.........A......................A.A........................A..A....A...A...........................A.....................

.............A.A.................................A.........A.........................................................A...A...........................A.....................

..........T......................................A.........................A........A....................................A.................................................

.....................T.........C.................A............A......................................................A...A.................................................

......AA.........................................A.......T.A...............................................................................................................

............................................A....A.........A...............................................................................................................

........................................................A..A..A....................AA......................T.........A.....................................................

.................................................A........AA..A......................................................A...A.................................................

........................................................A..A..A....................AA................................A....................................T................

........................................................A..A..A....................AA................................A............................A........................

.................................................A.......T.A.......................AA......................................................................................

.................................................A........AA..A......................................................A...A...............................T.................

...................................................G......AA.........................................................A...A...........................A.....................

.................................................A........AA.........................................................A...A...........................A.....................

.................................................A........AA.............................................................A.................................................

.................................................A........AA..A............................................................................................................

.................................................A........AA.........................................................A...A.................................................

..........................................................AA..A......................................................A...A..........................A......................

..........................................................AA..A..........................A...............................A.................................................

..........................................................AA........................A...............................A................................A.....................

.................................................A........AA.........................................................A............................A........................

..........................................................AA.................................................A.......A.....................................................

............C....................................A........AA..A.....................A................................A..............................AA.............A......A

..........................................................AA......................A............A.........................A.................................................

.......A.A...A.A...A.........A...................A.........A..A...................AA.....................A...........A.....................................................

.......A.A...A.A...A.........A...................A.........A..A...................AA.........................A.......A.....................................................

.......A.....A.A...A.........A...................A.........A..A...................AA.........................A.......A........T............................................

.......A.....A.A...A.........A...................A.........A..A...................AA...C.....................A.......A.....................................................

TTTG.....C...A.A...A......................................AA........................A....................................A.........A.......................................

......AA.......A.................................A............A......................A...................A...........A............................A..............A.........

......AA.........................................A.......T....A..........................................................A...........................A.....................

......AA...........A.......................A.....A.........A..A.........A................................A...........A...A.................................................

......AA.........................................A............A..........................................................A..........A......................................

......AA.........................................A............A..........................................................A.................................................

......AA.....................................T................A..........................................A......A....A...A..........................AA.....................

......AA.........................................A........A...A...........A....................................................A....................A......................

......AA.........................................A............A......................................................A...........................................A.........

......AA...........A.......................A.....A.........A..A.....................A................................A..............................AA.............A.......

......AA...............................T.........A........AA..A.....................A................................A..............................AA.............A.......

......AA.A...A.A...A.........A...................A.........A..A.............C.....AA.........................A.......A.....................................................

..........T..............................................T.............T................T.T.T........T.TT.................................T.T..................T..........T

..........T...T..................................A...................T..................T...T........T.T...T.............................................T.....T...........

........................................................................................T.T.T........T.TT.................................T.T..................T..........T

.....................................................T..................................T.T.T........T.T...T.......T..........T.........T.T.T.............................T

..............T......................................T..................................T.T.T........T.T...T.......T..........T.........T.TTT..............................

.....................................................T..................................T.T.T........T.T...T..................G.........T.T.T..............................

.....................................................T...........T....A.................T.T.T........T.T...T.......T..........T.........T.T.T..............................

........................................................................................T.T.T........T.T...T.......T..........T.........T.T.T..............................

.....................................................T..................................T.T.T........T.T...T.......T..........T.........T.T.T..............................

.....................................................TT...AA..A........................................................T.A.................................................

...........T.....................................A............A........T....................T..............................................................................

..........T......................................A...........TA......T......................T........T.T...T...................................................T...........

...T.............................................A........AA..A...T..................................................A...A.................................................

...........T.....................................A............A........T....................T.............................................T................................

...........T.....................................A............A........T....................T..............................................................................

T......A.....A.A...A.........A...................A.........A..A................T..AA.........................A.......A.....................................................

.....................................................T..................................T.T.T........T.T...T.....................................................A.........

..........T......................................A...........TA......T..............A...T...T..........T...T.............................................T.....T...........

..........T......................................A...........TA......T..................T...T........T.T.................................................T.....T...........

..........T......................................A...........TA......T..................T...T........T.T...T...............................................................

..........T......A...............................A...........TA......T..................T...T........T.T...T.............................................T.....T...........

..........T......................................A...........TA......T..................T...T........T.T.A.T...................A.........................T.....T...........

..........T......................................A...........TA......T..................T...T........T.T...T.............................................T.....T...........

**QT6/HBV+3G@89.2°C**

CCAACTGGATCCTGCGCGGGACGTCCTTTGTTTACGTCCCGTCGGCGCTGAATCCTGCGGACGACCCTTCTCGGGGTCGCTTGGGACTCTCTCGTCCCCTTCTCCGTCTGCCGTTCCGACCGACCACGGGGCGCACCTCTCTTTACGCGGACTCCCCGTCTGTGCCTTCTC

......A..........A.........................A.....A......A.A........C..............AA.....................A..........................A...............A......................

......AA.....A...AA..............................A........A.............A.........AA.................................A..............................A......................

......AA.........................................A......................AA........AAA........................A.......A...A.....AAAA..............................A.A.......

......AA.........AA..............................A........A.............AA........AA............................A..............AA...................A......................

......AA.....A...AA........................A.A...A........A..............AA.......AA............................A........A......A.................A.A......................

......AA.........AA........................A............................AAA...A...AAA....................................A.....AA...................A..............A.......

......A..........................................A........A.............AA........AAA................................A...A.....AA...................A..............A.......

......A......................A.............A.....A........A.............AA.A..A...AA..............................................................A.A..............A.......

......AA.....A.A.A...........A..............A....A........A.......................AA............................................AA..................A......................

......A..........A......................A..A.....A........A.............AA........AAA..........................................AA...A...............A......................

......AA.........AA........................A............................AAA.......AA.........A.................................AAA..................A..............A.......

......AA.....A...AA.G......................A.....A........A..............AA.......AA............................................A...................A......................

......A..........AA........................A..............A..............A....A...AA............................A..............AAA..................A..................A...

......A..........AA..............................A.......................A....A...AA.................................A...A.....AA...................A......................

......AA.........AA........................A.....A........A..............A....A...AA................................................................A......................

......AA.........AA.................C......A............................AAA...A...AAA....................................A.....AA...................A......................

......AA.....................A.............A.....A........A.............AAA...A...AA..............................................................A.AA...........A.A.......

......AA.........AA........................A............................AAA.......AA.........A.................................AAA..A...............A..............A.......

......A..........................................A......................AAA...A...AA...........................................AA...................A......................

......A..........AA........................A.....A........A.............AAA.......AA............................................A...................A..............A.......

......AA.....A...A.........................A.....A........A.............AA........AA.........A......................................................A..............A.......

......A..........A...........A...................A........A..............A....A...AA...........................................AA...................A............A.A.......

......A..........AA..............................A........A.............A.........AA...........................................AA...A...............A......................

......AA.........AA........................A............................AAA...A...AAA....................................A.....AA...................A........A...A.A.......

......AA.....A...AAA.......................A.....A......A.A.............AAA.......AA.........A......................................................A........A...A.A.......

.........C.......AA........................A.....A......A.A..............AA...A...AA................................................................AA.....................

......A..........AA..........A.............A.....A......................AAA...A...AAA..........................................AA...................A......................

......AA.....................A............................A.............A.........AAA........A...............A......................................A........A...A.A.......

......A......................A.............A......................................AAA...........................A...................A...............A..............A.......

......AA...................................A..A.........................AAA.......AA...........................................AA...................A......................

......AA...................................A.....A......................AA........AAA........................A.......A...A.....AAAA..............................A.A......A

......AA.........A...............................A........A..............A........AA...........................................AAA.................AA......................

......A..........A.........................A.....A........A.............AA........AA.........A......................................................A......................

......AA.........AA..........A.....A.......A..A..A........A..............AA...A...AA.................................A......A..AA...................A......................

......AA.....A...AAA.............................A........A.............AAA.......AA............................A..............AA...................A......................

......AA.........AA........................A.....A........A..............AA.......AA............................A........A......A.................A.A......................

......A..........AA......................................................A....A...AA.................................A...A..........................A........A...A.........

......A..........A......................A.................A..............AA.......AA.........A.......................A...A.....AA...................A..............A.......

......AA.....................A..............A....A........A..............A........AA............................................AA..................A......................

......AA.....................A.............A..A..A........A...A..........A....A...AA............................................AA..................A........A...A.........

.T....................................TT..T............................T....................T...TT......T...........T.......T..............................TT..............

.T.........T.............T............TT.............TT..T........T....T................T.T.T...TTT....TT......T....T...T...T...........T...T....T.......T.TT..T.....T..T.T

.T.........T.............T............TT.............TT..T........T....T................T.T.T...TTT....TT......T....T...T...T...........T...T.............TTT........T..T.T

..........................................T............................T..................T.T....T......T......T....T...T...T..........TT...T............TTT.........T....T

...........T...........................T.............TT..T.............T................T.T.T...TTT....TT..T...T....T...T..............T...................TT.............T

...........T..............................T..T........T..T........T....T................T...T.....T....TT..T...T....T..T................T..................TT.............T

...........T.............T............................T...........T....T....................T....TT.....T......T....T...T.................................TT...T...........

.T.........T..........................TT.............TT..T........T....T................T.T.T...TTT....TT......T....T...T...T...........T...T....T.......T.TT..T.....T..T.T

...........T...........................T..............T...........T....T....................T....T......T......T....T...T................................T..T.............T

...........T..............................T..T........T..T........T....T................T...T.....T....TT..T...T....T...................T..................TT.............T

.T.........T.............T............TT..............T................T................T.T.T...TTT.....T......T....T...T...T...............T..............TT........T..T.T

.T........................................T..T........T..T........T....T................T...T.....T....TT..T...T....T...................T..................TT...........T.T

.T........TT...........................T..T...........T................T................T.T.T...TTT....TT...........T...T...T...........T...T......T.....T.T..............T

.T....T...TT.....AA......T............TT..T......A...TT..........TT.....A.........AA...........................................AA..........................................

.T.........T.............T............TT.............TT..T........T....T.............................................A...A..........................A........A...A.........

**QT6/HBV+Gc@89.2°C**

CCAACTGGATCCTGCGCGGGACGTCCTTTGTTTACGTCCCGTCGGCGCTGAATCCTGCGGACGACCCTTCTCGGGGTCGCTTGGGACTCTCTCGTCCCCTTCTCCGTCTGCCGTTCCGACCGACCACGGGGCGCACCTCTCTTTACGCGGACTCCCCGTCTGTGCCTTCTC

......A..........AA..............................A........A.......................AA...........................................A....................A............A.........

......AA...................................A.....A......................AAA...A...AA................................................................A..................A...

......A..........AA..............................A........A.............A.........AA...........................................AA...................A......................

......AA...................................A.....A......................AAA.......AA.....................................A..........................A......................

......A..........................................A......................AA........AA.....................A.....................AA...................A......................

......A..........A...............................A......A.A..............A........AA............................................A...................A......................

......AA.........A...............................A........A.......................AA...........................................AA...................A............A.........

......A..........................................A........A.............A.........AA...........................................AA...................A......................

......A..........AA..........A............................A.......................AAA..........................................AA..........................................

......A..........AA..............................A........A.............A.........AAA..........................................AA...................A......................

......AA...................................A.....A......................AAA.......AA................................................................A......................

.............A...AA...........................................................A...AA................................................................A......................

......A......................A..........................................AAA...A...AA.......................................................................................

......AA.........A.........................A.....A........A.............A.........A............................................AA...................A......................

......A...T......................................A......................AA........AA...........................................AA..........................................

......A.................................A..A..A..A........A..............A....A...AA................................................................A......................

......A..........AA.......................................A.............A.........AAA..........................................AA...................A......................

......AA.........A.........................A..A..A........A.............A.........A............................................AA...................A......................

.T....A..........................................A......................AA........AA...........................................AAA..................A......................

......A..........A...............................A......A.A..............A........AA............................................A.................A.A......................

......A..........................................A................................AA................................................................A......................

......A..........................................A......................AA........AA...........................................AA...................A......................

......AA...........................A.......A.....A......................AAA...A...AA..............................................................A.A......................

......A..........................................A........A.............A.........AA................................................................A......................

......A.................................A..A..A..A........A..............A....A...AA.......................................................................................

.T........TT.................A............................A.............AAA...A...AA.......................................................................................

...........T..........................................T................T................T.T.T...TTT.....T......T....T...T...T..A....A.......T.............TT..............T

...........T..........................................T................T................T.T.T...TTT....TT......T....T...T...T...........T...T......T.....T.T..............T

.T........TT...........................T..T...........T................T................T.T.T...TTT....TT......T....T...T...T...........T...T......T.....T.T..............T

.T........TT...........................T..T...........T............C...T................T.T.T....TT....TT......T....T...T...T...........T...T......T.....T.T..............T

.T........TT...........................T..T...........T................T................T.T.T...TTT....TT......T....T...T...T...........T...T......T.....T.T.......A......T

.T........TT...........................T..T...........T................T................T.T.T...TTT....TT......T....T...T...T...........T...T............T.T..............T

.T.........T..........................................T................T................T.T.T...TTT.....T......T....T...T...T..T....T.......T.............TT..............T

.T........TT...........................T..T...........T................T................T.T.T...TTT....TT...........T...T...T...........T...T......T.....T.T..............T

.T........TT...........................T..T...........T................T.......T........T.T.T...TTT....TT......T....T...T...T...........T...T......T.....T.T..............T

.T........TT...........................T..T...........T................T................T.T.T...TTT....TT......T....T...T...T...........T...T.......T......................

.T........TT...........................................................T................T.T.T...TTT....TT......T....T...T...T...........T...T......T.....T.T..............T
