# Supplementary material for: Genetic Editing of HBV DNA by Monodomain Human APOBEC3 Cytidine Deaminases and the Recombinant Nature of APOBEC3G
Source: PLOS journal article supplement (doi:10.1371/journal.pone.0004277), 2009-01-23
Supplement: S2 (10.1371/journal.pone.0004277.s002) [file journal.pone.0004277.s002]

# Supporting Information Figure 2. Complete collections of HIV-1∆*vif* edited sequences by six A3 cytidine deaminases

# HIV-1Dvif/APOBEC3A@78°C

AAATTAACCCCACTCTGTGTTAGTTTAAAGTGCACTGATTTGAAGAATGATACTAATACCAATAGTAGTAGCGGGAGAATGATAATGGAGAAAGGAGAGATAAAAAACTGCTCTTTCAATATCAGCACAAGCATAAGAGATAAGGTGCAGAAAGAATATGCATTCTTTTATAAACTTGATATAGTACCAATAGATAATACCAGCTATAGGTTGATAAGTTGTAACACCTCAGTCATTACACAGGCCTGTCCAAAGGTATCC

...............................................................................................................................................A...............A.......................A............................A................................................

................................................................................................................................................................................................A...................A................................................

......................A.............A....A..A...A.......................AAA.A...A.....AA.....AA.A.A.....................................A.A....A.....A...A.......................A.....A........A...............A...A.......A........................................

......................................................................................AA.A...AA......................................................................................................................................................................

......................A.............A....A..A...A...............A..A..A.A.......A.....AA.A...AA.A.A..........A..............A....G......A.A..........A...A.......................A.....A........A...............A...A....A..A..........A..........AA..........A......

................A.....A.............A....A..A...A.....................A.AAA.A...A.....AA.A...AA.A.A..................................................A...A.......................A..............A...............A...A.......A........................................

................A.A.................A....A..A...A...............A.......AAA.A...A.....AA.A...AA.A.A.....................................A.A..............A.......................A..............A...................A.. .............................................

....................................A....A..A...A..................A....AAA.A...A.....AA.A...AA.A.--....................................A.A..........A...A.-...A.................A..............A...............A...A....A.............A...............A......AA.....

......................A.............A....A..A..CA...............A.......AAA.A...A.....AA.A...AA.A.--..............................A.....A.A....AA....A...A.......................A..............A...................A....A..A..........................A.............

................A.A...A......A......A....A..A...A...............A..A..A.AAA.A...A.....AA.A...AA.A.A..........A.............CA.....A..............................................A.....A........A...............A...A....A..A..........A..........AA..........A......

...C............A.A.................A....A..A...A...............A.......AAA.A...A.....AA.A...AA.A.A.....................................A.A......................................A..............A...................A................................................

......................A.............A....A..A...A...............A.......AAA.A...A.....AA.A...AA.A.A...............................A.....A.A....AA....A...A.......................A..............A...............A...A....A..A..........................A.............

..G.............A.A...A.............A....A..A...A..................A....AAA.A...A.....AA.A...AA.A.A-....................................A.A..........A...A.......................A..............A...............A...A....A.............A...............A......AA.....

............................................................................A...A........A...........................................................................................................................................................................

................A.A...A.............A....A..A...A..................A....AAA.A...A.A...AA.A...AA.A.--....................................A.A..........A...A.....A.................A..............A...............A...A....A........................AA...A......A......

.........................................A..............................................................................................A.A..........A...A....C..................A...................................................................................

.........................................................................................................................................................................................................................A..A..........................A.............

.........................................A..A...A...........................A...A.....AA.A...AA...A.......................................A..............A.......................A...................................................................................

.........................................A..A...A...........................A...A.....AA.A...AA.A.A-......................................A..............A.......................A..............A...................A................................................

.........................................A..............................................................................................A.A..........A...A.......................A.......................................A...........................................

# HIV-1Dvif /APOBEC3B@78°C

AAATTAACCCCACTCTGTGTTAGTTTAAAGTGCACTGATTTGAAGAATGATACTAATACCAATAGTAGTAGCGGGAGAATGATAATGGAGAAAGGAGAGATAAAAAACTGCTCTTTCAATATCAGCACAAGCATAAGAGATAAGGTGCAGAAAGAATATGCATTCTTTTATAAACTTGATATAGTACCAATAGATAATACCAGCTATAGGTTGATAAGTTGTAACACCTCAGTCATTACACAGGCCTGTCCAAAGGTATCC

....................................A....A......A.......................AAA.....A.....AA.A....A.A.A.....................................A.A....A.....A...A.....A.................A..............A...............AA..A................................................

......................A.............A....A..A......................A....AAA.A...A.....AA................................................A.A..........A...A.-.....................A..............................A...A................................................

................A...................A....A..A...A..................A....AAA.A...A.....AA.A...AA.A.A-..............................A.....A.A....AA....A...A.......................A..............A...............A...A.........................................A......

....................................A....A..A......................A....AAA.A...A.....AA................................................A.A..........A...A.......................A..............................A...A................................................

................A...................A....A..A...A.......................AAA.A...A.....AA.A...AA.A.A-....................................A.A....A.....A...A.......................A..............A...............A...A.......A.................................A......

.........................................A..A...A.......................A...A...A.....AA.A...AA.A.A.....................................A.A....A.................................A..............A...................A................................................

....................................A....A......................................A......A.....A..A.A.............................................A.A..............................A..............A...............A...A................................................

.........................................A......A........................A..A...A.....AA.A...AA.A.--......................................A..............A.......................A..............A...............A...A................................................

.........................................A......A.........................A.....A.....AA.A...AA...A.....................................A.A......................................A..............A...............A...A.........................................A......

.........................................A......A...............................A.....AA......A...A..................................................A...........................A..............A...................A................................................

....................................A....A..A...A...........................A...A......A.....A............................................A..............A.......................A..............A...............A...A................................T...............

....................................A....A..A...A.........................A.A...A.....AA.A...AA...A..............................................................................A..............A...................A................................................

................A...................A....A..A...A.........................A.A...A.....AA.A...AA.A.A.....................................A......A.....A...A.......................A..............A...............A...A.........................................A......

....................................A....A.........................A....AA..A...A......A..........A............................................A.........A.......................A..............A....................................................................

................A...................A....A..A...A.........................A.A...A.....AA.A...AA.A.A.....................................A.A....A.........A.......................A..............A...................A................................................

....................................A....A..A...A...............................A......A.A...AA.A.A.....................................A.A....AA........A.......................A..................................A................................................

....................................A....A..A...A.......................A.A.A...A.....AA.A....A.A.A.....................................A.A....A.........A.......................A..............A...............A...A.........................................A......

....................................A....A..A...A.......................A.......A......A........A.......................................A.A......................................A..............A...................A................................................

....................................A....A..A...A...............................A.....AA.A...A..A.A.....................................A.A....A..A..A..........................................A...............A...A.......A........................................

....................................A....A..A...A.......................AAA.A...A.....AA.A....A.A.A.....................................A.A..........A...A.......................A..............A...................A.........................................A......

....................................A....A..A...A.......................A...A...A.....AA.A....A...A.....................................A.A....A.........A.......................A..............A...................A................................................

....................................A....A..A...A.......................A.A.A...A......A.A....A.A.A.....................................A.A....A.........A.......................A.....A........A...............A...A................................................

....................................A....A......A.......................A...A...A.....AA.A......A.A...................G.................A.A....A.....A...........................A..............A...................A................................................

.........................................A......A.......................A...A..........A.....A....A..................................................A...........................A..............................A...A................................................

.........................................A..A...A.......................A.A.A...A.....AA.A....A.A.A.....................................A.A....A.................................A..............A...............A...A.........................................A......

................A...................A....A..A...A....................G....A.A...A.....AA.A...AA.A.A.......-.............................A......A.....A...A.......................A..............A...............A...A.........................................A......

#

# HIV-1Dvif /APOBEC3C@78°C

AAATTAACCCCACTCTGTGTTAGTTTAAAGTGCACTGATTTGAAGAATGATACTAATACCAATAGTAGTAGCGGGAGAATGATAATGGAGAAAGGAGAGATAAAAAACTGCTCTTTCAATATCAGCACAAGCATAAGAGATAAGGTGCAGAAAGAATATGCATTCTTTTATAAACTTGATATAGTACCAATAGATAATACCAGCTATAGGTTGATAAGTTGTAACACCTCAGTCATTACACAGGCCTGTCCAAAGGTATCC

...............................A.........A..A...................A..A....AAA.A...A.....AA.A...AA..............A..............A.....A.....A.A......AA..A.........A.................A.....A........A.........A.........A.......A........................................

..................A............A....A....A..A...................A..A....AAA.A...A.....AA.A...AA..............A..............A.....A.....A.A.......A..A.........A.................A.....A........A.........A.........A.......A........................................

................A.A..........A.A....A....A.......................A.A..A.AAA.A...A......A....................................A...........A.A....AA.A..A...A.-...A.................A.....A........A......................................A.............................

....................................A....A..A............................AA.A...............................................A.....A.....A.A....AA.A..A...A.....A.................A.....A........A.........A.................A..........A......................AA.....

....................................A....A..A............................AA.A...................A...........................A.....A.....A.A....AA.A..A...A.....A.................A.....A........A.........A.................A..........A......................AA.....

....................................A....A..A............................AA.A...............................................A.....A.....A.A....AA.A..A...A.....A.................A.....A........A.........A..............A..A..........A......................AA.....

....................................A....A..A...A........................AA.A...-...........................................A.....A.....A.A....AA.A..A...A.....A.................A.....A........A.........A.................A..........A......................AA.....

...................................................................A............A........A...................A..........................A.......................................................A.........A...............A.A..........................A......AA.....

......................A........A....A.......A................................................A....A..........A..............A.....A.............................................................A...........................A..........................A.............

...............................A................A...............................................A.A..........A....................A...............A............A................................A.........A.........A....A..A.......C................................

..............A..........................A..A.........................................A......................A..............A..................................A.......................A........A...........................A..........................A......AA.....

......................A........A....A....A..A...A...............A...........A................A....A..........A............................A.....A.A............A.................A..................................A..................................A.............

.............................A.A....A....A......................A.................................A..........A..............A.....A.....A......AA................................A..............A.........A............................A......................AA.....

................A.A...A.....................A...A...............A..A............A............................A....................A............................A..........................................A...................................................AA.....

................A.A......................A......................................A............................A............................A....A-.A............A.......................................................................A.............................

...............................A.............................................................................A....................A.....A..............................................A........A....................................................................

................A.A...A.............A....A..A...A...............A...............A............................A..............A.....A.....A.A....AA.A..............................A.....................................................................A......A......

................A.A...A.............A....A..A...A...............A...............A............................A..............A.....A.....A.A....AA.A..............................A..............A....................................................................

...............................A..............................................................A..............A.................................A.........A.....A.......................A........A....................................................................

..................A............A.........A..A...A..................A............A.....AA.A......A.A..........A..........................A.A.......A......A.....A..........................................A.................A........................................

................A............A.A.............................................................................A..........................A............A.........A.................A..............A...................A.......A..........................A.............

..............................................................................................A..............A............................A..............A.....A.......................A........A.................................................AA.................

................................................................................A................GA..........A...C......................A.........A......A.......................A...................................................................................

................................................A...........................................G................A..............A.....A......................A.....A.................A..............A...................A..................................A.............

...............................A................................................A.................................................................A............A.................A..............A...............A...........A.....................A...........AA.....

....................................A................................................................................................................A...A.......................A..............A........................A........................AA...A.............

....................................A........................................................................A..............................................................................................................A..........................A.............

..........................................................................................................................T........................T............T...T...........................................................T........T...........................

................................T...................T...............................................................T.....T....T...................T................T...........................................................T....T...T......T...T................

....................................................A.........................................................T...........T........T...............T.................................................................................................................

# HIV-1Dvif /APOBEC3F@78°C

AAATTAACCCCACTCTGTGTTAGTTTAAAGTGCACTGATTTGAAGAATGATACTAATACCAATAGTAGTAGCGGGAGAATGATAATGGAGAAAGGAGAGATAAAAAACTGCTCTTTCAATATCAGCACAAGCATAAGAGATAAGGTGCAGAAAGAATATGCATTCTTTTATAAACTTGATATAGTACCAATAGATAATACCAGCTATAGGTTGATAAGTTGTAACACCTCAGTCATTACACAGGCCTGTCCAAAGGTATCC

....................................A....A..A...A.....................A..AA.A...A......A.A..............................................A.........A......A.......................A..............A.........A..........................................................

..........................................................................A.A...A....................................................................................................................................................................................

........................................................................A.A.A...A.....AA.A...A-.........................................A.A......................................A..............A...................A................................................

....................................A....A..A...A........................AA.A...A.................A..........A....................................A..............................A..............A....................................................................

....................................A....A..A...A.....................A...A.A...A.....AA.A...A-.A.A......................................................A.......................A..............A...................A................................................

.........................................A..A............................AA.A.........AA.A...AA.A-.......................................................A......................................A...................A................................................

...............................A....A....A..A...A.......................AAA.A...A.....AA.A...A-.A.A.....................................A.A....A.........A.....A..............T..A..............A...................A................................................

................A..............A....A....A..A...A.....................A...A.A...A.....AA.A..............................................A.A..........A...A.......................A..............A...................A................................................

...............................A....A....A..A...A.....................A.AAA.A...A.....AA.A...AA.A.A.A.....-..A...........................................AG....A.................A..............A.........A.........A................................................

....................................A....A..A...A.....................A.AAA.A...A.....AA.A...AA.A.ATA.....-.......................A.....A.A..........A...A.......................A..................................A................................................

................A..............A....A....A..A...A.....................A...A.A...A.....AA.A..............................................A.A....A.....A...A.......................A..............A...................A................................................

.........................................A................................A.A............A....A.........................................A.A......................................A..............A...................A....A...........................................

...............................A....A....A..A.........................A.AAA.A...A.....AA.A....A.A....................................................A...................................................................A...........................................

....................................A.......A...A...........................A...A.....AA.A....A.A.A.....................................A.A....A.........A.......................A..............A.........A.........A.............................A..................

....................................A....A..A...A..................A..A.AAA.A...A.....AA.A...A-.A............A.......................................A..........................................A...................A................................................

................A.A...A........A....A....A..A...A.....................A.AAA.A...A.....AA.A...A-.A.A..........A..............A.....A.....A.A.......A..A...A.....A.................A..............A.........A.....A...A................................................

................A.A...A........A....A....A..A...A.....................A.AAA.A...A.....AA.A...AA.A.A..........A..............A.....A.....A.A.......A..A...A.....A.................A..............A.........A.....A...A................................................

................A.A...A........A....A....A..A...A.....................A.AAA.A...A.....AA.A...A-.A.A..........A..............A.....A.....A.A....A..A..A...A.....A.................A..............A.........A.....A...A................................................

................A.A...A........A....A....A..A...A.....................A.AAA.A...A.....AA.A...AA.---..........A..............A.....A.....A.A.......A..A...A.....A.................A..............A.........A.....A...A................................................

.........................................A..A......................A..A.....A...A........A....A..........................................................A....................................................................................................A......

....................................A....A..A.........................A.AAA.A............A...AA..........................................................A......................................A...................A................................................

.........................................A..A............................AA.A.........AA.A...AA.A.A.A.....-..........................................A...A......................................A...................A................................................

....................................A....A..A...A.....................A.AAA.A...A.....AA.A....A.A.A......................................................A.....A.................A..................................A................................................

.........................................A..A...A.....................A...A.A...A.....AA.A....A.........................................A.A..........A...A.......................A..............A....................................................................

.........................................A......A.....................A.AAA.A...A........................................................................A..........................................................A................................................

....................C..........A....A....A..A......................A.....AA.A...A.....AA.A....A.........................................A.......................................................A...................A................................................

..............C..C.............A....A....A..A...A.....................A.AAA.A...A.....AA.A...AA.A.A.A....--.......................A.....A.A.......A......A.......................A..............A...................A................................................

.........................................A..A.........................A.AAA.A...A.....AA.A...AA...........A..........................................................A...............................................................................................

....................................A....A..A............................AA.A...A.....AA.A...............................................................A.......................A..............A....................................................................

............................................................................A...A........A..........................................................................................................................A................................................

.............A.................A....A....A..A...A.....................A.AAA.A...A.....AA.A...AA.A.A..........A...........A........A.....A.........A......A.......................A..............A.........A.A...A...A................................................

....................................A....A..A...............................A...A......A.A...A....A......................................................A......................................A...................A................................................

............................................A...........................AAA.A.................A......................................................................................................................................................................

............................................A...A.........................A.A...A.....AA.A....A.....................................................................................................................A................................................

....................................A....A..A...A......G..............A.AAA.A...A.....AA.A...--.A.A................................T......A....A.....A...A.......................A..............A.........A.........A................................................

....................................A....A..A...A.....................A.AAA.A...A.....AA.A...AA.---................................T......A..........A...A.......................A..............A.........A.........A................................................

....................................A....A..A..CA.....................A.AAA.A...A.....AA.A...--.A.A................................T......A..........A...A.-.....................A..............A.........A.........A................................................

....................................A....A..A...A.....................A.AAA.A...A.....AA.A...A-.A.A................................T......A..........A...A.......................A..............A.........A.........A................................................

# HIV-1Dvif /APOBEC3G@78°C

AAATTAACCCCACTCTGTGTTAGTTTAAAGTGCACTGATTTGAAGAATGATACTAATACCAATAGTAGTAGCGGGAGAATGATAATGGAGAAAGGAGAGATAAAAAACTGCTCTTTCAATATCAGCACAAGCATAAGAGATAAGGTGCAGAAAGAATATGCATTCTTTTATAAACTTGATATAGTACCAATAGATAATACCAGCTATAGGTTGATAAGTTGTAACACCTCAGTCATTACACAGGCCTGTCCAAAGGTATCC

....................................A....A..............................AAA...........A......AA......................................................A...........................A..............................A...A.........................................A......

........................................................................A.A...........A......A....A..................................................A................C..........A..............................A.................................A...........A......

....................................A....A..............................AAA...........A......AA.................................................AA...A...........................A..............................A...A.........................................A......

.............................................................C..........A.............AA.....A..A..............................................A................................................A...............A.............................................A......

....................................A....A..A...A......................................A.....A....A..................................................A...A.......................A..............................A...A.........................................A......

....................................A....A......A.......................AAA...........AA.....A.................................................A................................................................A.............................................A......

....................................A...........A.......................A.A.A...A.....A......A..A.A.............................................................................................................A...A.........................................A......

................A........................A..A...........................AA............AA.....AA.A.......................................A......A.....A..........................................A...............A...A..........G..............................A......

............................................A...........................AA......A.....A..A....A.A.A.......................................A......................................A..................................A.........................................A......

.........................................A..............................A.A.A...A.....A......AA...A.....................................A......A.................................A..............................A...A................A........................A......

................................................A.......................AA............A.......A.........................................A.A....A.................................A..............................A...A.........................................A......

................A...................A....A..A...A.......................AAA.....A.....AA.....AA...................................................A.............................................A...............A...A.........................................A......

................A........................A..A...A.......................AAA.....A.....AA.A...A..A.......................................A......A.................................A..............A...............A...A.............................A...........A......

................A........................A..A...A.......................AA..A.........AA.....A..A.A..................................................A..........................................A...............A...A.........................................A......

................A...................A....A..A...A.......................AAA.....A.....AA.....AA.................................................................................................A...............A...A.........................................A...C..

................A...................A....A..A...A.......................AAA.A...A.....AA.....A.AA-.......................................................A.......................A..............A...............A...A.......A.....................A...........A......

................A........................A..............................AA..A...A.....AA.....A..A...........................A...........A......A.................................A..............................A...A.............................A...........A......

..................A.................A....A..............................A.A.A.........AA.A...AA.A....................................................A...........................A..............A...............A...A.......A.................................A......

......................A.............A....A..A...A.......................A.A.A...A.....AA.A...AA.A---....................................A......A.................................A..............A...............A...A.......A.................................A......

......................A.............A....A..A...A.......................A.A.....A.....AA.A...AA.A.--.........A..........................A.A....A.........A.......................A..............A...............A...A.......A.....................A...........A......

......................A........A....A....A..A...A...............A..A..A.AAA.A.-.A.....AA.A...AA.A.A-.........A..................................................................................................A.............................................A......

................A...........................A...........................A.A...........AA......A.A.A.....................................A.........A..A..........................................................A...A.............................A...........A......

........................................................................A.............A......A.............T....................................................................................................A...A.........................................A......

....................................A....A......A.......................A.A.....A.....AA.A...A..A..........A............................A......A.....A...........................A..............................A...A.........................................A......

................A...........................A...........................A.A...........AA......A.A.A.....................................A............A..........................................................A...A.............................A...........A......

........................................................................A.............AA......A.................................................................................................................A...A.........................................A......

....................................A...................................AA......A.....AA.....A..A.A.....................................A......A.................................A..............A...............A...A.........................................A......

....................................A....A....G.A.......................A.A.A...A.....AA.A....A.A-...........A..........................A......A.....A................C..........A..............................A...A.............................................A..

.........................................A................................A............A........................................................................................................................A...A.........................................A......

.........................................A..............................AA..A.........A......A..A.A..................................................A...........................A..............................A...A.........................................A......

....................................A....A......A.......................A.A.A...A.....AA.A...A..A............A..........................A.......................................................................A...A.........................................A......

.........................................A..............................AA..A.........A......A..A....................................................A...........................A..............................A...A.........................................A......

................................................A.......................A.A.....A.....AA.....A..A..............................................A................................................A...............A...A.........................................A......

....................................A....A..A...........................A.............A.........................................................................................................................A.............................................A......

........................................................................A..............A.....A..A.......................................A......A.................................A..............................A.............................................A......

.........................................A..A.............................A............A........................................................................................................................A...A.........................................A......

................A........................A..............................A.A.A...A.....AA.A...A..A.......................................A.......................................................................A...A.............................A...........A......

.G.......................................A..............................A.A...........A.................................................A............A...........................A..............................A..............................................A.....

.....G..............................A....A..A...........................A.A.A.........AA.....A..A..............................................A.................................A..............................A...A.............................A...........A......

....................................A....A..A...A.......................A.A.....A.....AA.....A..A.A............................................A.................................A..............................A...A..............................................TT

...........................................................T............AA......A.....A.........A.............T.T...T.....T...................................................T.................................A....................T...T.........................T.

....................................A....A..............................AAA.....A.....A.........A.............T.T...T.....T...................................................T.................................A....................T...T.........................T.

# HIV-1Dvif /APOBEC3H@78°C

AAATTAACCCCACTCTGTGTTAGTTTAAAGTGCACTGATTTGAAGAATGATACTAATACCAATAGTAGTAGCGGGAGAATGATAATGGAGAAAGGAGAGATAAAAAACTGCTCTTTCAATATCAGCACAAGCATAAGAGATAAGGTGCAGAAAGAATATGCATTCTTTTATAAACTTGATATAGTACCAATAGATAATACCAGCTATAGGTTGATAAGTTGTAACACCTCAGTCATTACACAGGCCTGTCCAAAGGTATCC

.........................................A..............................A.A.....A.....A......A..A.........................................A....A.................................A..............................A...A.......A..........................A......A......

....................................A....A..A...A.......................A.A.A...A.....AA.A...AA.A.A-....................................A.A..........................................................................................................................

....................................A....A..A...............................A...A.............A.........................................A.A....A.....A...........................A..............A...................A................................................

....................................A....A..A...A.........................A.....A.....AA.A...AA.A.A.......................................A......................................A..............A...................A................................................

....................................A....A..A...A..................A....A.A.A...A.....AA.A....A.A.A.....................................A.A....A.........A.......................A..............A...................A................................................

....................................A....A..A...A..................A....A.A.A...A.....AA.A....A.A.A.....................................A.A....A.........A.......................A..............A...................A....A...........................................

....................................A....A..A...A..................A....A.A.A...A.....AA.A....A.A.A.....................................A.A....A.........A.......................A..............A...................A.............................A...........A......

...............................A....A....A..A...A.....................A...A.....A........A....A.A.A..........A..............A...........A.A......................................A.....A........A...............A...A................................................

....................................A....A......A...............A.......A.A.A...A.....A..A......A.A..........A..........................A.A....AA................................A..............A...............A...A................................................

....................................A....A......A...............A.......A.A.A...A.....A..A......A.A..........A..........................A.A....A.................................A..............A...............A...A................................................

....................................A....A......A...............A.......AAA.A...A.....A..A......A.A..........A..........................A.A....A.................................A..............A...............A...A................................................

.............................A.A.........A......A..................A....AA..A...A.....AA.A....A..............A..............A.....................A..............................A..............A.........A.........A....A..A........................................

...............................A....A....A..A...A.......................AAA.A...A.....AA.A...AA.A.A-....................................A.A......................................A..............A...................A.........................................AA.....

................A...................A....A..A...A..................A....AAA.A...A.....AA.A...AA.A.A..........A............................A......................................A..............A...................A................................................

........................................................................A.......A.....A......AA.A.......................................A.......................................................................A....................................................

.........................................A..A...A..................A....A.A.A...A......A......A.A.A..............................................................................A..............A...............A...A.........................................A......

...........C.............................A..A...A...........................A...A...............A.A.....................................A.A....A..A..A...................................................................................T...........................

....................................A....A......A.......................A.......A........A...AA.A.A.....................................A.A....A.........A.......................A..............A...............A...A................................................

........................................................................A............................................................................A..........................................................A....................................................

..........................................................................................................................T........................T.....................................................................................T...............T.........T.
